1           **Real-Time Semi-Automated and Automated Voxel Placement for Repeated**  
2                           **Acquisition Magnetic Resonance Spectroscopy**

3  
4           James H. Bishop, Ph.D.<sup>1,2</sup>, Andrew Geoly, M.S.<sup>1</sup>, Naushaba Khan, M.S.<sup>1</sup>, Claudia  
5           Tischler, B.A.<sup>1</sup>, Ruben Krueger, B.S.<sup>1</sup>, Heer Amin, B.S.<sup>1</sup>, Laima Baltusis, Ph.D.<sup>3</sup>, Hua  
6           Wu, Ph.D.<sup>3</sup>, David Spiegel, M.D.<sup>1</sup>, Nolan Williams, M.D.<sup>1</sup>, Matthew D. Sacchet, Ph.D.<sup>4</sup>

7  
8           <sup>1</sup>Department of Psychiatry and Behavioral Sciences, Stanford University, Stanford, CA,  
9           USA

10           <sup>2</sup>Department of Radiology, Stanford University, Stanford, CA, USA

11           <sup>3</sup>Center for Cognitive and Neurobiological Imaging, Stanford University, Stanford, CA,  
12           USA

13           <sup>4</sup>Center for Depression, Anxiety, and Stress Research, McLean Hospital, Harvard  
14           Medical School, Belmont, MA, USA

15  
16           Corresponding Author

17           Matthew Sacchet, Ph.D., Center for Depression, Anxiety and Stress Research, McLean  
18           Hospital, 115 Mill Street, Belmont, MA 02478, USA, email: [msacchet@mclean.harvard.edu](mailto:msacchet@mclean.harvard.edu)

19  
20           Key Words: magnetic resonance spectroscopy (MRS), voxel placement, data acquisition,  
21           reliability, reproducibility, longitudinal

22  
23           Running Title: Automated MRS voxel placement

32 **ABSTRACT**

33

34 Magnetic resonance spectroscopy (MRS) is heavily dependent on the investigative team  
35 to prescribe, or demarcate, the desired tissue volume-of-interest. Manual prescription, the  
36 current standard in the field, requires expertise in neuroanatomy to ensure spatial  
37 consistency within and across subjects. Spatial precision of MRS voxel placement thus  
38 presents challenges for cross-sectional studies, and even more so for repeated-measure  
39 and multi-acquisition designs. Furthermore, voxel prescriptions based-solely on  
40 anatomical landmarks may not be ideal in regions with substantial functional and  
41 cytoarchitectural variability or to examine individualized/targeted interventions. Here we  
42 propose and validate robust and real-time methods to automate MRS voxel placement  
43 using functionally defined coordinates within the left dorsolateral prefrontal cortex in  
44 clinical cohorts of chronic pain and depression. We hypothesized that increased  
45 automation would produce more consistent voxel placement across repeated acquisitions  
46 particularly in reference to standard manual prescription. Data were collected and  
47 analyzed using two independent prospective transcranial magnetic stimulation studies: 1)  
48 a single-day multi-session sandwich design and 2) a longitudinal design. Participants with  
49 fibromyalgia syndrome (N=50) and major depressive disorder (N=35) underwent MRI as  
50 part of ongoing clinical studies. MEGA-PRESS and Optimized-PRESS MRS acquisitions  
51 were acquired at 3-tesla. Evaluation of the reproducibility of spatial location and tissue  
52 segmentation was assessed for: 1) manual, 2) semi-automated, and 3) automated voxel  
53 prescription approaches. Variability of grey and white matter voxel tissue composition  
54 was reduced using automated placement protocols as confirmed by common MRS  
55 software processing pipelines (Gannet; SPM-based segmentation) and via Freesurfer-  
56 based segmentation. Spatially, post- to pre- voxel center-of-gravity distance was reduced  
57 and voxel overlap increased significantly across datasets using automated compared to  
58 manual procedures. These results demonstrate the within subject reliability and  
59 reproducibility of a method for reducing variability introduced by spatial inconsistencies  
60 during MRS acquisitions. The proposed method is a meaningful advance toward  
61 improved consistency of MRS data in neuroscience and can be leveraged for multi-

62 session and longitudinal studies that target precisely defined regions-of-interest via a  
63 coordinate-based approach.

64  
65  
66  
67  
68  
69  
70  
71  
72  
73  
74  
75  
76  
77  
78  
79  
80  
81  
82  
83  
84  
85  
86  
87  
88  
89  
90  
91  
92

93 **INTRODUCTION**

94

95 Magnetic resonance spectroscopy (MRS) is a non-invasive brain imaging approach  
96 capable of quantifying diverse metabolic and biochemical processes including specific  
97 neurotransmitters (1,2). For many other magnetic resonance imaging (MRI) approaches  
98 it is often standard procedure to collect data from the entire brain and then conduct *post*  
99 *hoc* analyses on defined regions-of-interest. Alternatively, MRS generally requires the  
100 user to prospectively delineate the tissue volumes-of-interest (VOI). This difference in  
101 MRS acquisition necessitates new methods for reliable and reproducible data collection  
102 that are unique from those for other imaging approaches (e.g., fMRI). Designing studies  
103 without precisely placed voxels limits the utility of MRS for use in evaluating complex  
104 disorders and interventions. As a related example, neuromodulation approaches such as  
105 transcranial magnetic stimulation (TMS) have been historically guided by skull-based  
106 measurements. Prefrontal structures targeted for clinical applications demonstrate  
107 substantial variability across individuals (3). Even with the capability of modulating brain  
108 tissue with centimeter-resolution (4), evidence suggests that individualized optimization  
109 of treatment location using functional brain imaging constrained within a designated  
110 anatomical region provides more consistent therapeutic outcomes (5,6). Similarly,  
111 investigating chemical alterations using MRS defined by standard anatomical landmarks  
112 across individuals may limit the utility and interpretability of such findings.

113

114 Precision of MRS VOIs is generally reliant on the clinical or investigative team and their  
115 neuroanatomical expertise. Furthermore, consistent voxel prescription is dependent on  
116 inter-subject anatomical variability. These factors may be compounded as the size of the  
117 VOI decreases, and with it the related biochemical measurements of interest (7).  
118 Standard MRS VOI placement approaches are especially problematic for multi-center,  
119 cross-sectional, and repeated measures trials that involve data collection by multiple  
120 users over time. Indeed, long-term projects often have turnover in research staff. Taken  
121 together, these factors contribute to increased variability and decreased consistency of  
122 voxel placement and thus weaken the validity of MRS measurements.

123

124 Inter-individual anatomical variability is a challenge for voxel prescription. Even if spatial  
125 consistency is achieved manually by the MRI system operator using only grossly visible  
126 landmarks, this does not ensure that the user is measuring the *functionally* analogous  
127 region across participants. Many of the current approaches for VOI placement ignore the  
128 functional and/or cytoarchitectural heterogeneity across brain structures because they  
129 are not visualizable. For context, prefrontal structures such as the dorsolateral prefrontal  
130 cortex (DLPFC) are highly variable across participants and have undergone iterations of  
131 refinement since the original Brodmann parcellations (8-11). This further confounds the  
132 utility of MRS to investigate complex disorders where the neural circuitry involved may  
133 not demonstrate grossly observable pathology. While integration of real-time functional  
134 MRI tasks for guiding voxel prescription has been developed, these techniques require  
135 robust and validated tasks that must be implemented in a short timeframe. For example,  
136 the use of functional localizers and task-based methods such as finger tapping, the n-  
137 back task, or visual stimuli have been use to guide voxel placement in the motor,  
138 prefrontal, and visual cortices respectively (12-14). These methods are promising,  
139 however, an expansion of the approach to enable coordinate-based prescription across  
140 participants is warranted for placement in regions that lack definitive task-based activation  
141 paradigms or to ensure consistent placement across repeated MRI visits/scans without  
142 needing to reacquire localizers. Coordinate based voxel prescription enables a wide array  
143 of methodological flexibility that may increase the reliability within participants and across  
144 studies.

145  
146 Coordinate based anatomical voxel prescription methods have been developed to  
147 overcome the variability introduced by manual voxel placement, but the current  
148 approaches have yet to integrate placement with functional targets or in a within  
149 participant registration paradigm for repeated acquisition consistency. For example,  
150 several methods have been proposed that afford user independent automated VOI  
151 placement that utilize brain co-registration (alignment) methods. These rely on either  
152 affine (linear) or b-spline (non-linear) brain co-registration that align a subject's anatomical  
153 scan to a standard brain atlas or template during the imaging session (15). The  
154 registration parameters are then used to quantitatively identify template-to-individual

155 voxel placement coordinates which are then input by the user into the scanner acquisition  
156 software. Within automated approaches the choice of registration method has been  
157 shown to influence accuracy (16); however, this is a greater issue when registering  
158 standard brain templates or atlases to an individual subject's T1-weighted (T1w) image.  
159 For template-to-subject registration, non-linear registration approaches outperform affine  
160 registration at the downfall of increased computational time and required computing  
161 power (17). Alternatively, affine approaches are faster and require less computational  
162 resources (which may be helpful in real-time data acquisition contexts), and the  
163 performance of these approaches are optimal for within subject coregistration, however,  
164 this requires repeated acquisition paradigms.

165  
166 The use of MRS as a neuroscientific tool for the identification of neurochemical  
167 concentrations will benefit from methods that can be conducted quickly by study  
168 personnel, are reliably prescribed in an automated fashion, applied on an individual  
169 subject basis, and are reproducible across longitudinal, multi-acquisition, and repeated  
170 measurements. The methods used to determine VOIs, whether based on function,  
171 structure, or otherwise, are ultimately dependent on researcher or clinician preference  
172 and the scientific/clinical question. Here we provide a methodological framework for the  
173 automation of repeated-measure and longitudinal acquisition of MRS voxels in a  
174 heterogenous functional brain region, the dorsolateral prefrontal cortex (DLPFC). In this  
175 investigation, we examine two iterations of our approach which we term "semi-automated"  
176 and "automated" based on the amount of user input across repeated measure and  
177 longitudinal acquisitions as well as a manual MRS voxel prescription in two independent  
178 clinical datasets. We leverage fast b-spline (affine) registration of anatomical images and  
179 co-registration of an individual-based functional (fMRI) coordinate of interest to center the  
180 VOI in a clinically relevant portion of the left DLPFC (L-DLPFC). We hypothesized that  
181 the semi-automated and automated approaches would reduce spatial and tissue  
182 segmentation variability across repeated MRS acquisitions and voxels of different sizes  
183 within the L-DLPFC, as compared to a standard manual MRS voxel prescription approach.  
184 We implemented field-standard segmentation approaches, including those packaged  
185 within Freesurfer (18) and Statistical Parametric Mapping (SPM) (19), to evaluate tissue

186 fraction across prescription pipelines. To quantify the consistency of voxel placements,  
187 we calculated Euclidean distance from the center-of-gravity coordinates across scans, in  
188 addition to determining the similarity of MRS voxels using an overlap coefficient across  
189 repeated MRS acquisitions.

190

## 191 **METHODS**

192

### 193 ***Participant Recruitment and Evaluation***

194 Participants were recruited as part of two separate studies. Both studies were approved  
195 by the Stanford University Institutional Review Board (IRB) and participants provided  
196 informed consent. All procedures were in compliance with the Declaration of Helsinki.  
197 Prior to imaging, participants were evaluated for standard MRI contraindications, in-  
198 person, by study coordinators and a study physician and provided informed consent.

199

200 Study A was used to evaluate the voxel placement between independent MRI sessions  
201 spaced one hour apart. In brief, 50 participants with fibromyalgia syndrome, a chronic  
202 pain disorder, first underwent a baseline MRI (MRI #1) followed by two separate  
203 experimental days - each with two independent MRI scans (MRI #2-5) sandwiched  
204 between transcranial magnetic stimulation treatment (**Fig. 1**). Resting state functional  
205 scans were acquired at the baseline MRI (MRI #1), analyzed, and the identified L-DLPFC  
206 cluster coordinate was used during each of the subsequent MRIs (MRI #2-5) for  
207 automated voxel prescription. MRI sessions were approximately 1-hours and included a  
208 combination of structural, chemical, and functional acquisitions. GABA-edited MEGA-  
209 PRESS (MEshcher-Garwood Point RESolved Spectroscopy) and broad spectra  
210 Optimized-PRESS MRS sequences were collected pre- and post-TMS MRI sessions only.  
211 Imaging parameters are described in greater detail below. A total of 50 pre-/post-MEGA-  
212 PRESS and 50 pre-/post-Optimized-PRESS scans were collected culminating in 200 total  
213 acquisitions.

214

215 Study B was conducted in a treatment resistant major depressive disorder population  
216 undergoing resting state functional connectivity guided TMS therapy. The paradigm was

217 used to evaluate within-subject voxel placements between three independent MRI  
218 sessions at the following timepoints: (1) baseline (MRI #1), (2) one-week (MRI #2), and  
219 (3) one-month (MRI #3, **Fig. 1**). Resting state functional scans were collected and  
220 analyzed during the baseline MRI (MRI #1) and thus manual DLPFC voxel placement  
221 was instituted during this timepoint. The identified L-DLPFC resting state cluster  
222 coordinate was then used to guide the voxel placement during the one-week and one-  
223 month MRI evaluations (MRI #2-3). A combination of structural, chemical, and functional  
224 imaging was collected at all MRI sessions. MEGA-PRESS MRS for the 38 participants  
225 was acquired at each of the three timepoints detailed above and included 114 total  
226 MEGA-PRESS acquisitions. Imaging parameters are described in greater detail below.

227

### 228 ***MRI Data Acquisition***

229 MRI data were obtained using a research dedicated 3.0T General Electric Discovery  
230 MR750 instrument with a Nova Medical 32-channel head coil. Acquisition parameters  
231 were identical across both studies (i.e., studies A & B) and included a combination of:  
232 structural, chemical, and functional acquisitions. Whole-brain structural imaging consisted  
233 of a 0.9 mm<sup>3</sup> three-dimensional T1w Magnetization Prepared - Rapid Gradient Echo  
234 (MPRAGE) sequence. Whole-brain high resolution fMRI (resting state) was collected  
235 using a simultaneous multi-slice EPI sequence with the following parameters: echo time  
236 (TE) = 30 ms, repetition time (TR) = 2 s, flip angle = 77°, slice thickness = 1.8 mm, and  
237 FOV = 230 mm. Broad spectra and GABA+ MRS data were collected using Optimized-  
238 PRESS (20-22) and MEGA-PRESS (23) sequences respectively within the left DLPFC  
239 (L-DLPFC). MEGA-PRESS sequence parameters included: voxel size = 20x20x20 mm<sup>3</sup>  
240 (8 mL), TE = 68 ms; TR = 2 s; editing pulses applied at 1.9 ppm (ON) and 7.46 ppm (OFF)  
241 for a total acquisition time of ~10 min. Optimized-PRESS sequence parameters included:  
242 voxel size = 14x14x14 mm<sup>3</sup> (2.744 mL), TE = 35 ms; TR = 2 s for a total acquisition time  
243 of ~3 min. MRS voxels were placed according to several strategies described below.

244

### 245 ***Identification of rs-fMRI cluster for guided voxel prescription***

246 While both structural and functional targets are compatible with our automated MRS voxel  
247 placement procedure, here we investigated the reliability and utility of MRS targets that



248 were defined functionally given previous methods have validated the utility of structurally  
249 defined approaches using atlas-based coordinates.

250

251 In both studies, resting state functional connectivity clusters were identified to guide  
252 clinical TMS therapy for either chronic pain (Study A) or depression (Study B) providing  
253 a relevant paradigm for future application of this automated voxel prescription technique.

254 In Study A, a voxelwise analysis of the rs-fMRI scan was analyzed to determine the  
255 subregion of the L-DLPFC (Brodmann Area 9 + 46) that exhibited the greatest correlation  
256 with the dorsal anterior cingulate (dACC) (24). In Study B, a voxelwise analysis of the rs-  
257 fMRI scan was analyzed to determine the subregion of the L-DLPFC (Brodmann Area 46)  
258 exhibiting the greatest anti-correlation to the subgenual cingulate (sgCC) (5).

259

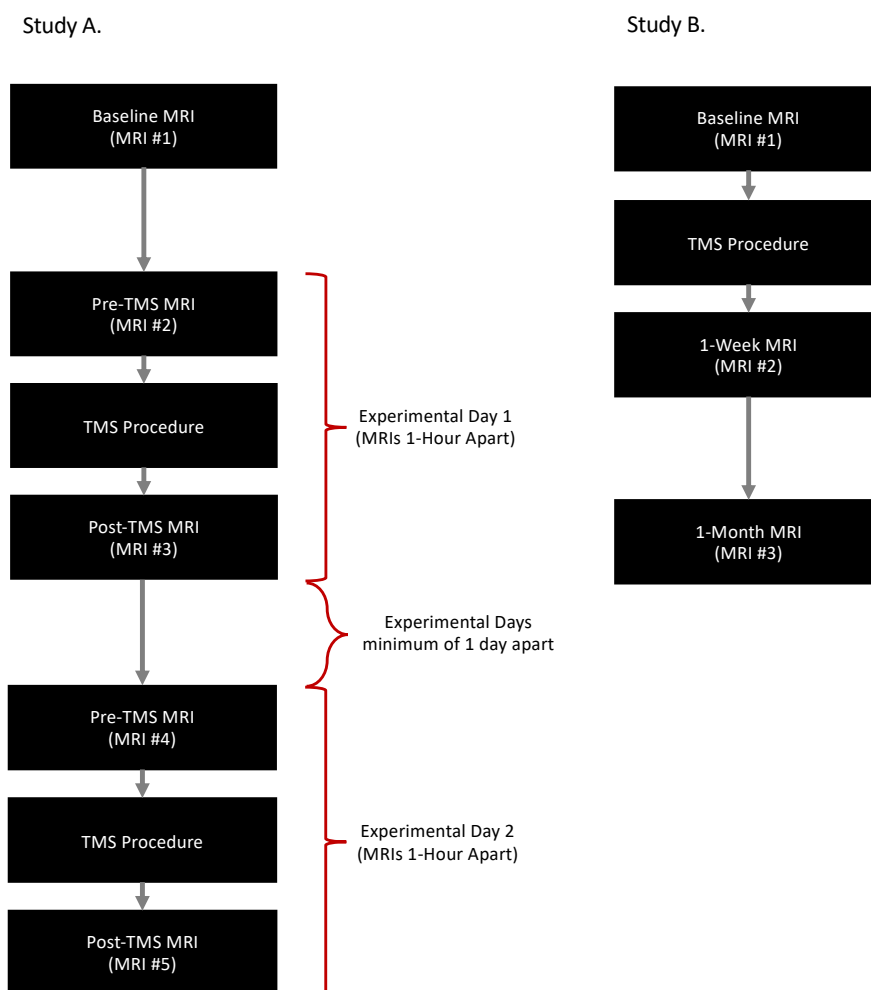

260

261 **Figure 1. Experimental Design:** Study A (left) timeline demonstrating a repeated-  
262 acquisition sandwich design where there were two different imaging days consisting of  
263 two independent MRI scans sandwiched between a TMS intervention. Study B (right)  
264 demonstrates a longitudinal imaging design with three independent scans at varying  
265 follow-up timeframes: baseline, one-week, and one-month MRI visits.

266

### 267 ***Voxel Prescription Procedures***

268 In the two studies we implemented three voxel prescription approaches: 1) manual, 2)  
269 semi-automated, and 3) automated. Each of the study specific protocols are outlined in  
270 detail below and typically can be completed concurrently during other desired acquisitions  
271 (i.e., structural or additional spectroscopic acquisitions, etc.) in several minutes or less:

272

273 In Study A, semi-automated and automated approaches were used. The baseline resting  
274 state fMRI scan (from the MRI #1; **Fig. 2**) was first analyzed as described above. On the  
275 subsequent independent pre- and post-TMS MRI sessions, L-DLPFC Optimized-PRESS  
276 and MEGA-PRESS voxel prescription was performed using two different iterations of our  
277 voxel prescription procedure termed semi-automated and an automated based on  
278 amount of required user input and fine tuning. For both prescription approaches, the  
279 center of gravity coordinate (mm) of the identified L-DLPFC functional cluster was  
280 extracted using the FSL Software (Version 6.0) via the `fsstats` function. In the semi-  
281 automated voxel placement approach, participants then underwent a pre-TMS MRI.  
282 During this imaging session, a T1w image was collected prior to either MEGA-PRESS,  
283 Optimized-PRESS, or both. Immediately following completion of the T1w image  
284 acquisition, a custom script was used to pull the MRI data directly from the imaging server.  
285 The T1w image was then reconstructed into Neuroimaging Informatics Technology  
286 Initiative (NIFTI) format. Next, a second in-house MATrix LABoratory (MATLAB; R2015a,  
287 The Mathworks, Inc.) script utilizing Statistical Parametric Mapping software version 12  
288 functions (SPM12; Wellcome Trust Centre for Neuroimaging). The baseline (MRI #1) T1w  
289 and pre-TMS (MRI #2) T1w images were co-registered while the participant underwent  
290 additional study specific MRI acquisitions. Co-registration was achieved using the  
291 `spm_coreg.m` function. Affine transformation matrices were defined using an optimized

292 normalized mutual information approach (25-27). Resulting affine transformation matrices  
293 were then used to convert the fMRI-based L-DLPFC center-of-gravity coordinate from  
294 baseline (MRI #1) to pre-TMS MRI space.

295  
296 Pre-TMS MRI voxel prescription for both Optimized-PRESS and MEGA-PRESS was then  
297 setup in two steps. First, voxel rotations were aligned to the skull geometry in the sagittal  
298 plane using a shim acquisition. Once the appropriate rotation was achieved and copied  
299 to either the MEGA-PRESS or Optimized-PRESS sequence, the voxel size was specified  
300 (MEGA-PRESS = 20x20x20 mm<sup>3</sup> and Optimized-PRESS 14x14x14 mm<sup>3</sup>) and the co-  
301 registration-defined coordinate (described above) was then input into the scanner console  
302 interface. This resulted in the placement of the center of the MRS voxel at the center of  
303 the desired functional ROI (**Fig. 2**). The term semi-automated pipeline was used due to  
304 the superficial nature of the cortical targets which required manually translating the voxel  
305 to ensure only brain tissue was encompassed within the bounding box (i.e., not skull and  
306 other non-brain tissue that can influence the MRS measurement). For the semi-  
307 automated pipeline group, this process, with the slight manual translation, was then  
308 repeated for all subsequent MRI sessions (**Fig. 2D top**).

309  
310 To further remove the required translation step from all but the first MRS acquisition, an  
311 automated procedure was developed. This automated method first implements the semi-  
312 automated approach as described above for registration from MRI #1 to MRI #2, followed  
313 by an increasingly automated procedure that obviates the need to translate the MRS  
314 voxel to avoid non-brain tissue. This is achieved by directly co-registering the translated  
315 MRS coordinate from MRI #2 for all subsequent acquisitions. The output of this procedure  
316 is thus a new co-registered coordinate that does not require additional manual adjustment  
317 for any subsequent repeated acquisition (**Fig. 2**).

318  
319 In Study B, MRS (MEGA-PRESS only) scans were acquired at baseline (MRI #1), after  
320 one week, and again after one month (**Fig. 2**) using manual or semi-automated voxel  
321 prescription approaches. Voxel prescription at baseline was conducted manually  
322 according to neuroanatomy without the use of any semi- or automated voxel placement

323 procedures. In brief, the voxel was aligned to the angle of the skull in the sagittal plane.  
324 Co-registration of the Brodmann Area 46 mask in standard space to the subjects T1-  
325 weighted image was first conducted and then the voxel was manually transcribed to  
326 center of the mask by visualizing participant specific anatomical landmarks. The 1-week  
327 and 1-month voxels were prescribed using the semi-automated approach described  
328 above. (**Fig. 2**).  
329

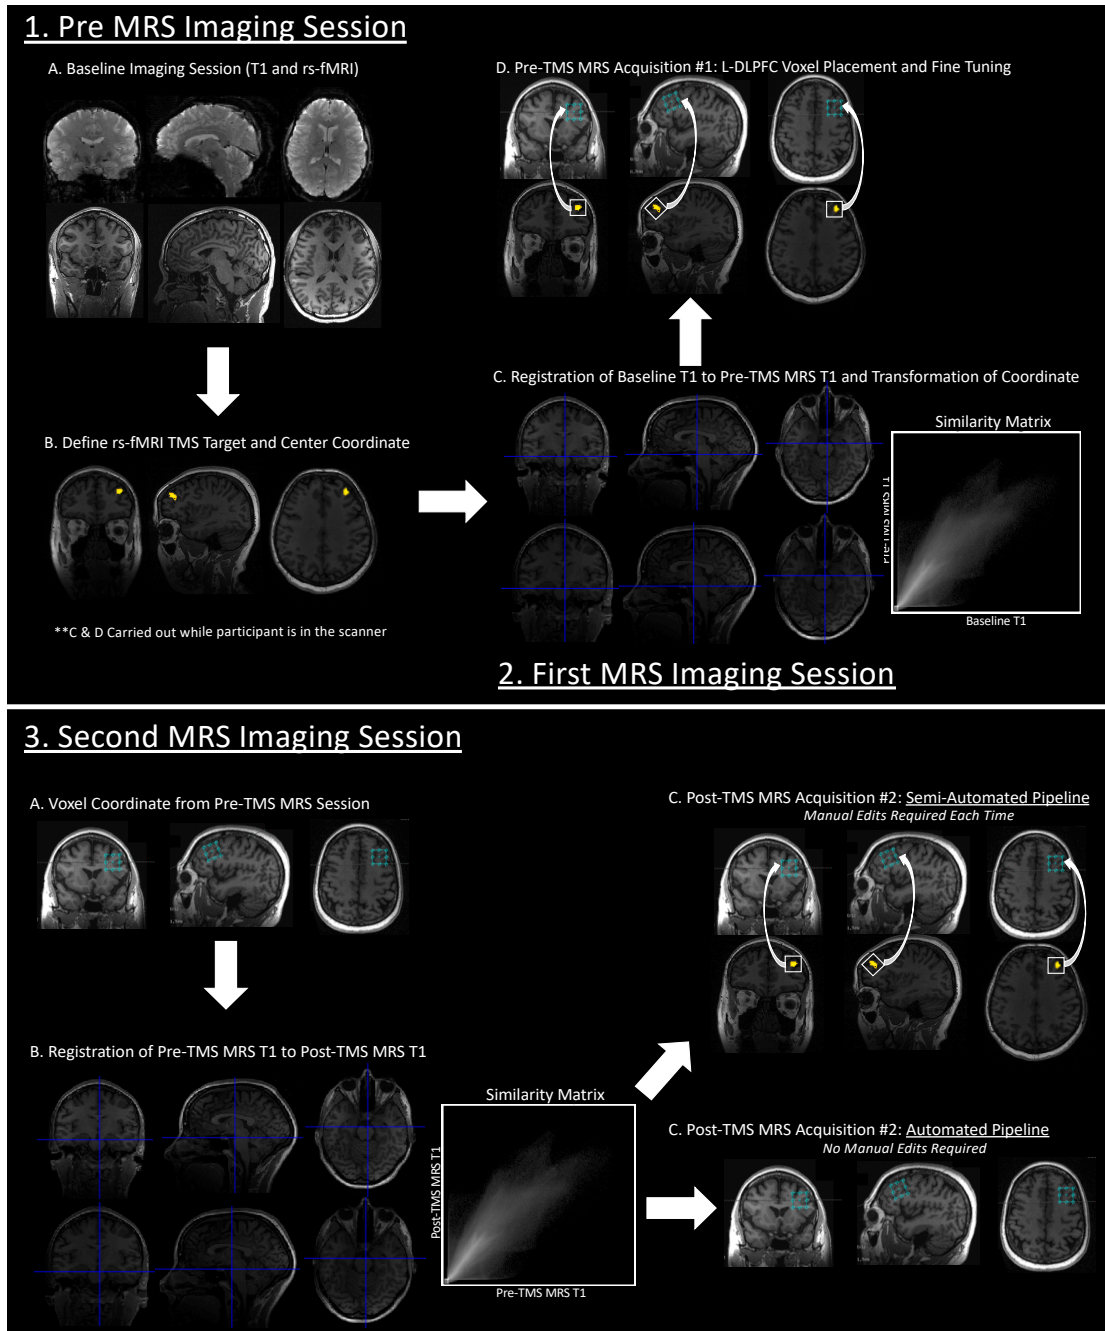

330

331

332

333

334

335

336

**Figure 2. VOI Prescription Schematic:** Schematic of semi-automated and automated voxel prescription procedure. Step 1 (upper section of image) – Pre-MRS Imaging Session: An MRI session consisting of T1w and resting state acquisitions (Study A) and also a manually prescribed L-DLPFC MEGA-PRESS scan for Study B (A). Resting state images were preprocessed and analyzed to define a functional ROI within the L-DLPFC (B). The center-of-gravity coordinate for the functional cluster was then determined using

337 FSL tools (fslstats). 2 – First MRS Imaging Session: During the second imaging session,  
338 a T1w was first acquired. Upon completion the scan, the T1w image was pulled directly  
339 from the MR system server, reconstructed, and co-registered to the pre-MRS T1w image  
340 (C). MRS voxel rotation aligned with the slope of the skull in the sagittal plane and the co-  
341 registered center-of-gravity coordinate in the current subject space was input into the  
342 scanner. Voxel location adjustments were made to ensure the entirety of the voxel was  
343 within brain tissue and did not encompass meninges or skull (D). Following minor  
344 adjustments, the final center-of-gravity voxel coordinates were documented for use in the  
345 subsequent independent MRS sessions. Notably this entire procedure requires several  
346 minutes (<3 in our experience). 3 – Second MRS Imaging Session: For the semi-  
347 automated voxel prescription pipeline the identical procedure described above was  
348 repeated (not shown). However, for the automated voxel prescription pipeline, the T1w  
349 image was again acquired first, directly pulled from the MR system server, and  
350 reconstructed. This time the current T1w image was co-registered to the first MRS T1w  
351 image along with the documented center-of-gravity coordinate defined after adjustments  
352 were made. Voxel rotation was aligned with the slope of the skull in the sagittal plane and  
353 the computed coordinate was input into the scanner software. If done correctly no further  
354 manual modification to the voxel location was required.

355

### 356 ***Voxel Composition***

357 GM and WM voxel segmentation fractions were evaluated across prescription protocols  
358 to determine the consistency and reliability of semi-automated and automated  
359 approaches. Both Freesurfer and the SPM segmentation output which is standard in the  
360 Gannet MRS processing package were assessed.

361

362 *Freesurfer Analysis:* T1w images were segmented using Freesurfer software (Version 6;  
363 (18)). Next, a custom MATLAB script was utilized to extract the 3-dimensional (3D) voxel  
364 mask from the raw MRS data (i.e., GE p-file). The scanner-reconstructed T1w image was  
365 then reoriented to standard space (fslreorient2std; FSL software toolbox) and the 3D  
366 voxel mask and script-generated T1w image geometries were standardized using the  
367 flscpgeom command. AFNI (28) 3dcalc was then used to compute the WM, GM, and

368 cerebrospinal fluid (CSF) segmentation percentages of the 3D voxel from the Freesurfer  
369 generated segmentation (aseg.mgz) file.

370

371 *SPM Analysis:* The Gannet Software toolbox (29) is a freely available software suite that  
372 is commonly used to process and analyze MEGA-PRESS data. Gannet processing  
373 includes the option to implement batch tissue segmentation using SPM12 Software (19).  
374 GM, WM, and CSF tissue fractions were extracted from the MEGA-PRESS p-files using  
375 SPM via the GannetSegment function in the Gannet software toolbox (Version 3.0).  
376 Subsequent statistical analyses were carried out on GM and WM tissue fractions.

377

378 Although it is not within the scope of this manuscript to directly compare tissue  
379 segmentation approaches (i.e., Freesurfer vs. SPM), tissue fraction differences within the  
380 MRS voxel are known to influence metabolic concentration (30,31). For this reason, both  
381 Freesurfer and SPM segmentations were generated and compared.

382

### 383 ***Spatial Consistency of Voxel Placement***

384

#### 385 ***Euclidean Distance Analyses***

386 Euclidean distance from the center-of-gravity voxel coordinates across MRI timepoints  
387 were calculated to evaluate the stability of each of the prescription protocols (i.e., Study  
388 A MEGA-PRESS semi-automated vs. automated; Study A Optimized-PRESS semi-  
389 automated vs. automated; Study B MEGA-PRESS manual vs. semi-automated).  
390 Distance analyses were conducted in subject (T1w) space using FSL Software. For both  
391 Study A and Study B protocols, subjects' T1w scans for all MRI timepoints (MRI #2 and  
392 MRI #3) were linearly registered (flirt) to the baseline MRI (MRI #1) for both Study A and  
393 Study B. Next, the MRS voxels for each subsequent timepoint were co-registered to the  
394 baseline MRI scan. Three-dimensional center-of-gravity coordinates (mm-space) were  
395 extracted for each voxel and Euclidian distance was calculated.

396

#### 397 ***Dice Similarity Coefficient***

398 To examine the spatial overlap of the MRS voxels, the Sørensen–Dice Similarity  
399 Coefficient (DSC) was implemented (32,33). This is also referred to as the dice overlap  
400 coefficient. Each subjects T1w scans were co-registered to their baseline T1w scan using  
401 FSL LInear Registration Tools (FLIRT) with no resampling of the MRS voxels. DSC was  
402 then calculated in RStudio (*RStudio Team (2020). RStudio: Integrated Development for  
403 R. RStudio, PBC, Boston, MA URL <http://www.rstudio.com/>*) with the FSL wrapper  
404 functions ([https://rdrr.io/cran/fslr/man/fsl\\_dice.html](https://rdrr.io/cran/fslr/man/fsl_dice.html)). DSC was computed across all  
405 pipelines using binarized pre- and post- MRS voxel masks which are represented in the  
406 equation below as A and B respectively. DSC outputs range from 0, representing no  
407 overlap, to 1 which represents complete overlap. Greater overlap indicates greater  
408 consistency across the multi-session data.

409

$$410 \quad DSC = \frac{2(A \cap B)}{A + B}$$

411

## 412 **Statistical Analyses**

413

414 All statistical analyses were carried out in RStudio (Version 2018 1.2.1335). To determine  
415 the appropriate downstream statistical test to investigate differences in variability (SD)  
416 and means (M), both homogeneity of variance and normality were first assessed for  
417 segmentations (GM and WM), Euclidean distance, and overlap coefficient variables.  
418 Normality (distribution) of each variable was evaluated using the Shapiro-Wilk normality  
419 test (34). Homogeneity of variances were assessed between groups using either a  
420 standard *F* test if the variable(s) were normally distributed or alternatively with the non-  
421 parametric Fligner-Killeen Test (35) if there was a significant deviation from normality ( $p$   
422  $< 0.5$ ). Between group mean differences were determined using unpaired two-sample *t*-  
423 tests in Specifically, Welch's *t*-tests were implemented when homogeneity of variance  
424 tests were significant ( $p < 0.5$ ).

425

## 426 **RESULTS**

427



428 **Voxel Composition**

429 GM and WM composition of the L-DLPFC VOIs was assessed by first calculating the  
430 difference in longitudinal tissue fraction (Post-Pre) across prescription pipelines using  
431 standard segmentation approaches including both Freesurfer and SPM (**Table 1 & Fig.**  
432 **3**). In Study A (MEGA-PRESS:  $N = 50$ ; semi-automated = 26, automated = 24; Optimized-  
433 PRESS:  $N = 50$ ; semi-automated = 19, automated = 31), individuals underwent  
434 longitudinal MRI scanning approximately one-hour apart and semi-automated voxel  
435 prescription was compared to automated voxel prescription. Three participants in each of  
436 Study A and Study B were excluded from the analyses due to poor data quality and/or  
437 registration related issues (e.g., scanner related shim error). No significant between-  
438 pipeline differences in GM or WM voxel composition were identified for either MEGA-  
439 PRESS (voxel size =  $20\text{mm}^3$ ) or Optimized-PRESS acquisitions (voxel size =  $14\text{mm}^3$ )  
440 across segmentation methods. A significant between-pipeline difference in variance was  
441 observed in the MEGA-PRESS acquisition for both Freesurfer and SPM segmentations  
442 (**Table 1**), demonstrating a reduction in variability in voxel composition of both GM and  
443 WM with the automated prescription approach. Alternatively, tissue composition of the  
444 smaller Optimized-PRESS acquisition did not yield significant between-pipeline  
445 differences in either mean or variance.

446

**Study A – Δ Freesurfer Segmentation – MEGA-PRESS (20mm<sup>3</sup>)**

|                    |    | GM       |                     |       |                     | WM       |                    |       |           |
|--------------------|----|----------|---------------------|-------|---------------------|----------|--------------------|-------|-----------|
| Voxel Prescription | N  | M        | SD                  |       |                     | M        | SD                 |       |           |
| Semi-Automated     | 26 | -0.00209 | 0.0462              |       |                     | 0.00373  | 0.0654             |       |           |
| Automated          | 24 | -0.00466 | 0.0119              |       |                     | 0.00451  | 0.0127             |       |           |
|                    |    | $\chi^2$ | t [95% CI]          | df    | p                   | $\chi^2$ | t [95% CI]         | df    | p         |
| T-test             |    | -        | -0.27 [-0.02, 0.02] | 28.54 | 0.79                | -        | 0.06 [-0.03, 0.03] | 27.03 | 0.95      |
| F-test             |    | 16.04    | -                   | 1     | 6.20 <sup>05*</sup> | 14.84    | -                  | 1     | 0.000117* |

**Study A – Δ SPM Segmentation – MEGA-PRESS (20mm<sup>3</sup>)**

|                    |    | GM       |                     |       |       | WM       |                    |          |                     |
|--------------------|----|----------|---------------------|-------|-------|----------|--------------------|----------|---------------------|
| Voxel Prescription | N  | M        | SD                  |       |       | M        | SD                 |          |                     |
| Semi-Automated     | 26 | 0.00358  | 0.0373              |       |       | -0.00854 | 0.054              |          |                     |
| Automated          | 24 | 0.000458 | 0.0180              |       |       | 0.00338  | 0.0196             |          |                     |
|                    |    | $\chi^2$ | t [95% CI]          | df    | p     | F        | t [95% CI]         | df       | p                   |
| T-test             |    | -        | -0.37 [-0.02, 0.01] | 33.17 | 0.71  | -        | 1.02 [-0.01, 0.04] | 28.96    | 0.318               |
| F-test             |    | 6.03     | -                   | 1     | 0.01* | 0.13     | -                  | [23, 23] | 7.67 <sup>06*</sup> |

**Study A – Δ Freesurfer Segmentation – Optimized-PRESS (14mm<sup>3</sup>)**

|                    |    | GM       |                    |       |      | WM        |                    |       |      |
|--------------------|----|----------|--------------------|-------|------|-----------|--------------------|-------|------|
| Voxel Prescription | N  | M        | SD                 |       |      | M         | SD                 |       |      |
| Semi-Automated     | 19 | -0.0146  | 0.0458             |       |      | -0.00412  | 0.0394             |       |      |
| Automated          | 31 | -0.00737 | 0.0341             |       |      | -0.000291 | 0.0318             |       |      |
|                    |    | $\chi^2$ | t [95% CI]         | df    | p    | $\chi^2$  | t [95% CI]         | df    | p    |
| T-test             |    | -        | 0.60 [-0.02, 0.03] | 30.21 | 0.55 | -         | 0.36 [-0.02, 0.03] | 32.16 | 0.72 |
| F-test             |    | 0.60     | -                  | 1     | 0.44 | 0.39      | -                  | 1     | 0.53 |

**Study B – Δ Freesurfer Segmentation – MEGA-PRESS (20mm<sup>3</sup>)**

|                    |    | GM       |                     |          |        | WM       |                    |          |                    |
|--------------------|----|----------|---------------------|----------|--------|----------|--------------------|----------|--------------------|
| Voxel Prescription | N  | M        | SD                  |          |        | M        | SD                 |          |                    |
| Manual             | 20 | 0.00998  | 0.0898              |          |        | -0.00696 | 0.142              |          |                    |
| Semi-Automated     | 18 | -0.00453 | 0.0457              |          |        | 0.00417  | 0.0472             |          |                    |
|                    |    | F        | t [95% CI]          | df       | p      | F        | t [95% CI]         | df       | p                  |
| T-test             |    | -        | -0.64 [-0.06, 0.03] | 28.82    | 0.53   | -        | 0.33 [-0.06, 0.08] | 23.54    | 0.74               |
| F-test             |    | 0.26     | -                   | [17, 19] | 0.007* | 0.11     | -                  | [17, 19] | 3.08 <sup>5*</sup> |

**Study B – Δ SPM Segmentation – MEGA-PRESS (20mm<sup>3</sup>)**

|                    |    | GM       |                     |          |                    | WM      |                    |          |                    |
|--------------------|----|----------|---------------------|----------|--------------------|---------|--------------------|----------|--------------------|
| Voxel Prescription | N  | M        | SD                  |          |                    | M       | SD                 |          |                    |
| Manual             | 20 | 0.00220  | 0.0908              |          |                    | -0.0008 | 0.123              |          |                    |
| Semi-Automated     | 18 | -0.00439 | 0.0413              |          |                    | 0.00356 | 0.0500             |          |                    |
|                    |    | F        | t [95% CI]          | df       | p                  | F       | t [95% CI]         | df       | p                  |
| T-test             |    | -        | -0.29 [-0.05, 0.04] | 27.14    | 0.77               | -       | 0.15 [-0.06, 0.07] | 25.68    | 0.89               |
| F-test             |    | 0.21     | -                   | [17, 19] | 1.97 <sup>3*</sup> | 0.17    | -                  | [17, 19] | 4.97 <sup>4*</sup> |

448 **Table 1. Voxel Composition Across Multi-Acquisition and Longitudinal Studies:**  
449 Tissue fraction statistics for each project across voxel prescription approaches, MRS  
450 acquisitions of different sizes, and segmentation methods. Statistically significant  
451 differences are indicated by (\*).

452

453 In Study B (N=38; manual=20, semi-automated=18), individuals underwent longitudinal  
454 MRI scanning at three independent timepoints: baseline, one-week, and one-month.  
455 Manual prescription occurred at baseline and semi-automated functional connectivity  
456 guided placement occurred at one-week and 1-month utilizing the same functional-  
457 connectivity derived coordinate. Similar to Study A, the mean GM and WM fractions were  
458 not significantly different between voxel placement pipelines for either segmentation  
459 approach (**Fig. 3**). Also consistent with Study A, a significant between-pipeline difference  
460 in variance was identified across voxel prescription pipelines and segmentation  
461 approaches (**Table 1 & Fig. 3**).

462

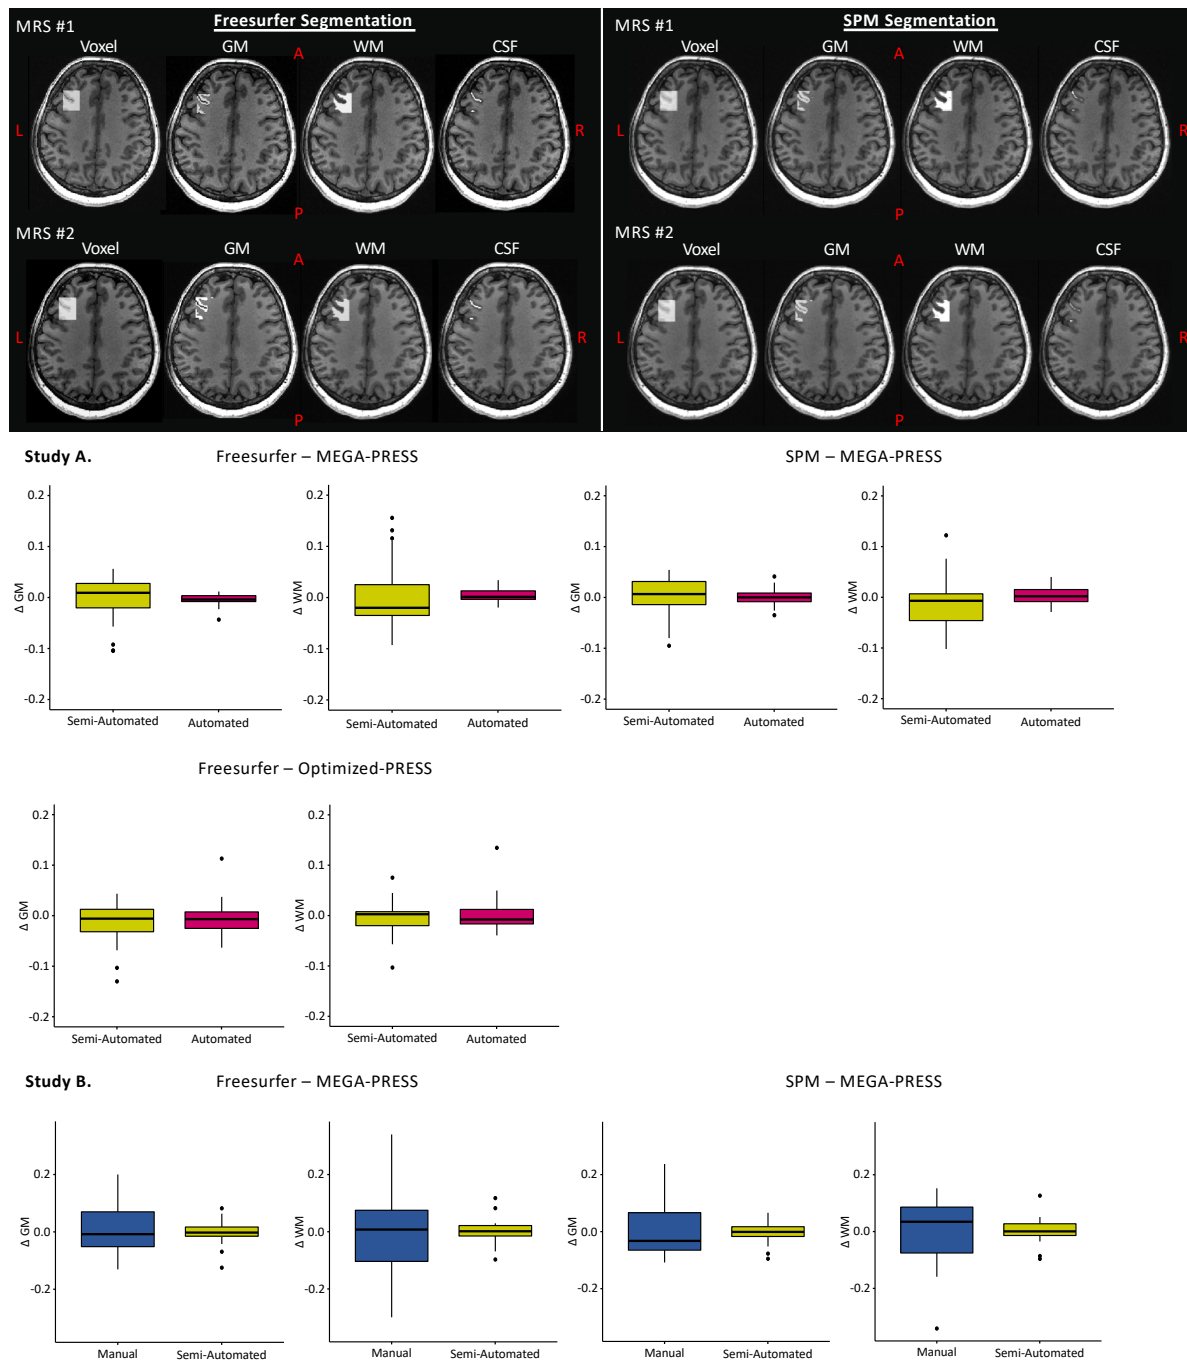

463

464 **Figure 3. Multi-Acquisition / Longitudinal L-DLPFC Voxel Tissue Composition:**

465 Tissue fractions were determined by calculating the differences between Freesurfer and

466 SPM segmentations across repeated independent MEGA-PRESS and Optimized-

467 PRESS acquisitions of difference voxel sizes. In Study A, tissue delta was defined as

468 Post MRI – Pre MRI GM and WM tissue fractions for both semi-automated and automated

469 prescription pipelines (Top). Study B included only MEGA-PRESS acquisitions, with  
 470 identical scan parameters as Study A. GM and WM tissue fractions for manual and semi-  
 471 automated placement were determined by computing the difference between the one-  
 472 week MRI – baseline MRI and one-month MRI – one-week MRI respectively. With the  
 473 exception of the Study A Optimized-PRESS measures, the more automated prescription  
 474 procedures reduced variability of tissue fraction.  
 475

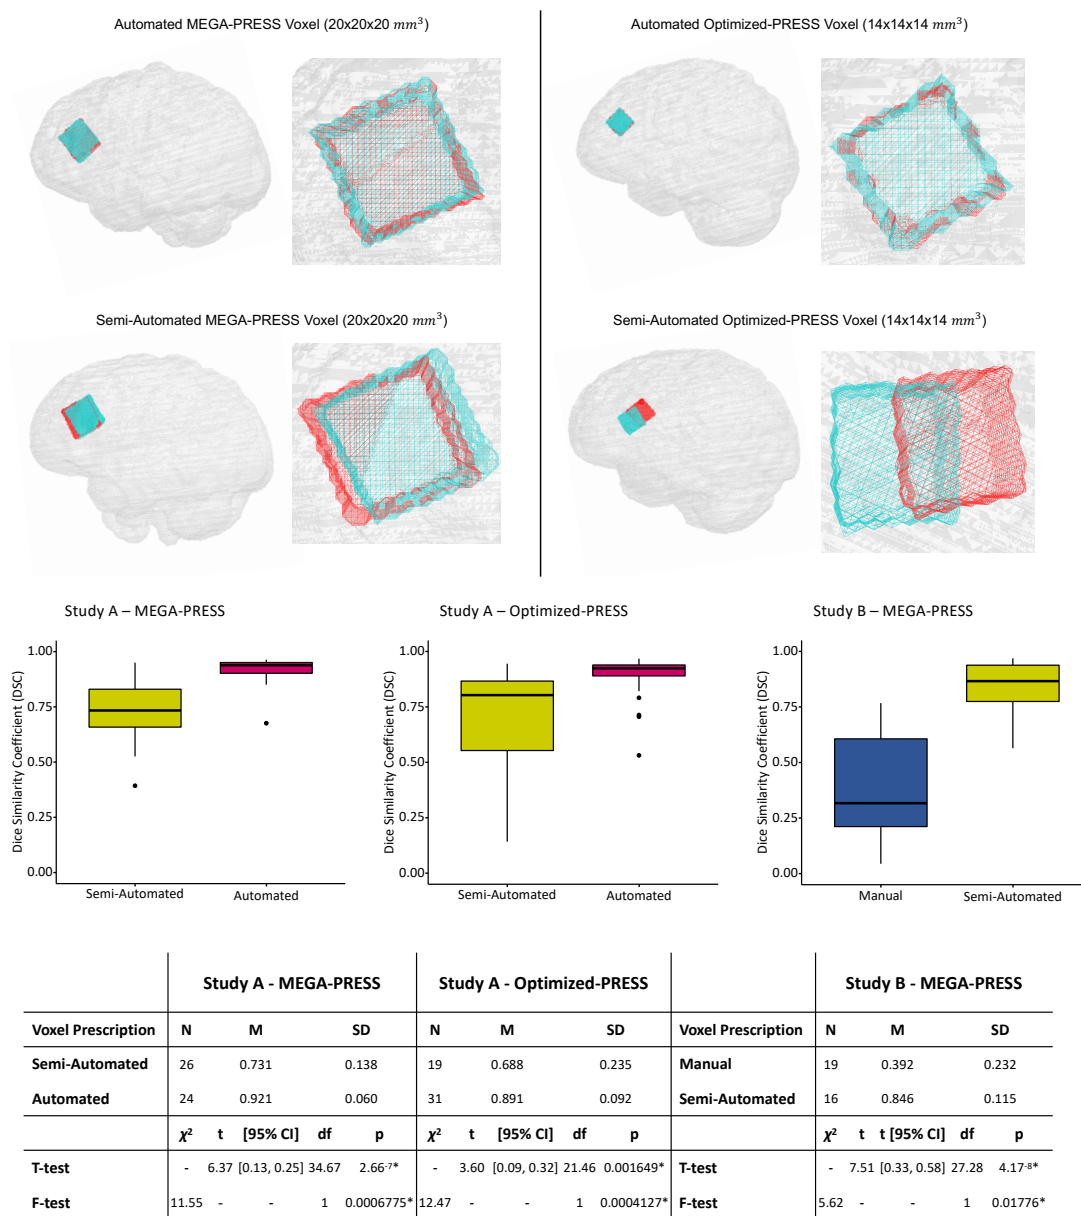

476

477 **Figure 4. L-DLPFC VOI Spatial Overlap**

478 Spatial congruency of the repeated MRS voxel prescriptions was also assessed by  
479 computing a dice similarity coefficient (DSC). Analyses were completed in individual  
480 subject space (T1w image-space) without the need for resampling the MRS voxel.  
481 Outputs of the DSC range from 0 (no overlap) to 1 (complete overlap). The table illustrates  
482 that the more automated the voxel prescription procedure the more spatial overlap  
483 regardless of voxel size. This is consistent in Study A where independent scans were  
484 acquired an hour apart and the automated pipeline outperformed the semi-automated  
485 prescription procedure with regard to overlap of the repeated placement. In Study B, the  
486 semi-automated prescription procedure outperformed the manual placement procedure  
487 even with increased duration between scans in the automated data acquisition, that is:  
488 Manual prescription data were acquired one-week apart and semi-automated data were  
489 acquired 1-month apart.

490

#### 491 ***Spatial Consistency: Euclidean Distance & DSC***

492 Euclidean distance was calculated and compared across acquisitions to assess the  
493 movement of the center-of-gravity for the MRS voxel (**Fig. 5**). DSC was computed and  
494 compared to further characterize the extent of spatial overlap between voxel prescription  
495 pipelines (**Fig. 4**). Three participants in each of Study A and Study B were excluded from  
496 the analyses due to poor data quality and/or registration related issues (e.g., scanner  
497 related shim error). In Study A, the automated voxel prescription performed significantly  
498 better than semi-automated placement for both MEGA-PRESS and Optimized-PRESS  
499 acquisitions as indicated by a reduction in center-of-gravity Euclidean distance and  
500 increased spatial overlap across repeated scans. This was demonstrated by large effect  
501 sizes across statistical comparisons of both Euclidian distance and DSC: MEGA-PRESS  
502 Euclidean distance (Cohen's  $d = -1.76$ , 95% CI = [-2.41, -1.10]), MEGA-PRESS DSC  
503 (Cohen's  $d = 1.75$ , 95% CI = [1.09, 2.40]), Optimized-PRESS Euclidean distance  
504 (Cohen's  $d = -1.59$ , 95% CI = [-2.04, -1.13]), and Optimized-PRESS DSC  
505 (Cohen's  $d = 1.38$ , 95% CI = [0.94, 1.82]). Similarly, in Study B, semi-automated voxel  
506 prescription significantly outperformed manual placement in both center-of-gravity  
507 Euclidean distance and spatial overlap (DSC) of the voxels even with the increased  
508 duration between scans, that is: one-month vs. one-week. Effect sizes were also

509 respectively large: MEGA-PRESS Euclidean distance (Cohen's  $d = -2.25$ , 95% CI = [-  
 510 3.10, -1.38]) and MEGA-PRESS DSC (Cohen's  $d = 2.42$ , 95% CI = [1.52, 3.29]).  
 511

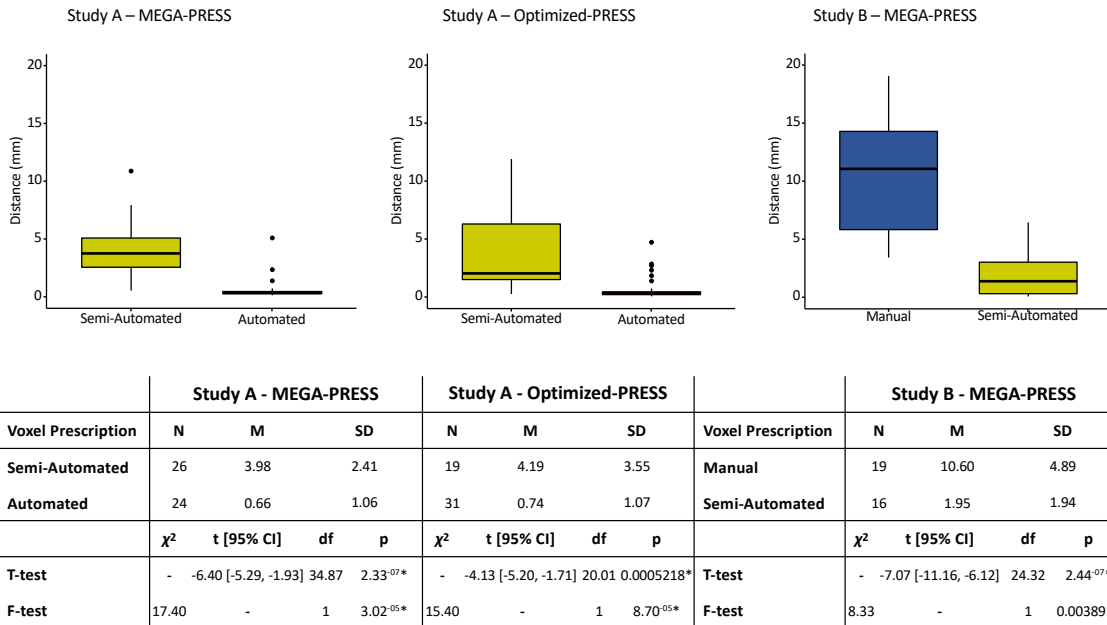

512  
 513 **Figure 5. L-DLPFC Multi-Acquisition / Longitudinal Euclidean Distance:** Automated  
 514 voxel placement reduced variability and mean distance of center-of-gravity  
 515 measurements. To determine the amount of change in geometric centers of prescriptions  
 516 following repeated acquisitions, center-of-gravity coordinates were extracted for each  
 517 voxel and Euclidean distance was calculated. Automated approaches reduced distance  
 518 measurements across both MRS acquisition size and study cohorts.

519  
 520 **DISCUSSION**

521  
 522 Here we report on novel voxel prescription pipelines that enable increasingly robust voxel  
 523 prescription for multi-acquisition as well as longitudinal MRS applications. To evaluate the  
 524 consistency of these approaches across several iterations of varying automation, we  
 525 investigated the spatial and anatomical reproducibility of repeated MRS acquisition  
 526 across two independent datasets. Validation of the technique was performed  
 527 quantitatively by examining the change in Euclidean distance of the voxel center-of-  
 528 gravity, defining the overlap of voxels using the DSC, and by evaluating the voxel tissue

529 composition fraction across acquisitions. Results of both datasets are consistent,  
530 demonstrating less variance across repeated prescriptions with increasing automation of  
531 the prescription approach - even in data acquired over a broad timeframe (i.e., one month  
532 between MRS acquisitions).

533

534 As personalized clinical interventions continue to gain traction, parallel improvements in  
535 methods used to measure clinical changes are necessary to identify underlying pathology  
536 and/or evaluate treatment course. Ultimately, the choice of acquisition method may  
537 depend on the research question at hand and particularly whether effects are expected  
538 to be focal or widespread. For example, it could be reasonably hypothesized that systemic  
539 pharmacological interventions exert brain-wide effects and thus automation of voxel  
540 prescription may not be warranted. Alternatively, the use of imaging acquisitions or  
541 modalities (i.e., functional, structural, positron emission tomography) to guide voxel  
542 placement would not only be useful for placement but also to provide biological or  
543 physiological justification for positioning within a structure. On the other hand, for  
544 investigations utilizing targeted neuromodulation paradigms such as transcranial  
545 magnetic stimulation, focused ultrasound, or focal drug release methods, the use of  
546 automated techniques that are not solely based on anatomical landmarks is critical.

547

548 In both studies, automated and semi-automated center-of-gravity Euclidean distance and  
549 DSC demonstrated highly reproducible voxel placements. While consistent manual voxel  
550 prescription has been reported in brain regions with well-defined boundaries and/or  
551 structural features (36), it is worth noting that the DLPFC results demonstrated here were  
552 observed using relatively small VOIs in the absence of a specific set of anatomical  
553 landmarks. This further underscores the utility of our approach for functionally defined  
554 regions-of-interest. In developing the voxel placement procedure, two versions of the  
555 pipeline were created, referred to as semi-automated and automated. These approaches  
556 are similar with the addition of one adjustment step at the end. This adjustment step is  
557 critical for MRS collected in superficial brain structures such as the cortex or immediately  
558 adjacent to a sinus to ensure that voxels are completely bound to brain tissue. In deep  
559 brain structures this adjustment step would likely not be necessary. Although neither



560 study directly compared all three approaches (manual, semi-automated, and automated)  
561 head-to-head, we demonstrated that increased automation of the voxel prescription  
562 process achieves highly spatially consistent voxels with marked reductions in within-  
563 subject tissue fraction variability. The distance and spatial overlap analyses provide  
564 complementary data that provide empirical evidence in support of this conclusion. Both  
565 the mean and variability of the distance measurements in the semi-automated pipeline  
566 did not increase across studies, even with increased time between scans (i.e., 1-month  
567 vs. 1-hour), and thus demonstrate the utility of this method across multi-acquisition and  
568 longitudinal study designs.

569

570 A source of variability not specifically accounted for in the outlined automation  
571 approaches is voxel rotation and is an area that warrants ongoing methodological  
572 development. To overcome this the present studies, the slope of the skull in the sagittal  
573 plane was used to guide voxel rotation, however, users will need to establish a set of  
574 criteria for consistent voxel rotation. The proposed voxel-placement methods do not  
575 completely obviate this challenge and source of variability from manual input particularly  
576 for subcortical VOIs. While the Euclidian distance comparison does not account for this  
577 potential source of variability as it is based on voxel center of gravity, the DSC does. This  
578 is because DSC determines the overlap of two volumes (here binary masks) that is thus  
579 useful for determining the effects that inconsistencies in rotation may have on the  
580 prescription pipeline. Our DSC results are consistent with a previously reported  
581 automated voxel prescription method that guides voxel placement based on anatomical  
582 ROIs (15), however, in the latter approach resampling is required. Resampling  
583 necessitates a modified calculation of the overlap coefficient that is termed the  
584 *generalized dice coefficient*. Additionally, Bai and colleagues assessed the reproducibility  
585 of manual voxel prescription by prescribing and acquiring the MRS voxel multiple times  
586 within a single scan session (i.e. patients were not removed from the scanner between  
587 acquisitions; (36)). Here we demonstrate that the spatial consistency of the automated  
588 and semi-automated approaches across multiple imaging sessions yielded greater inter-  
589 subject overlap coefficients comparatively even given the potential variability introduced  
590 by non-automated voxel rotation.

591  
592 Consistency in data collection is critical for methodologies used in any research  
593 application and if not it begs to question the validity of the measurement. MRS is currently  
594 one of the only non-invasive imaging techniques that can measure neurochemical  
595 concentrations *in vivo*. Reducing unwanted sources of variability during MRS voxel  
596 prescription will lead to more consistent and meaningful results in human neuroscience,  
597 particularly when focal interventions are being evaluated. For example, as metabolic  
598 molecule concentrations vary across tissue type (30,31), tissue concentration within the  
599 MRS voxel influences the acquired measurements (37). For example glutamate and  
600 glutamine concentrations have been shown to be higher in concentration within GM  
601 compared to WM (38) highlighting the advantage of reduced GM and WM tissue fraction  
602 variability observed using automated voxel placement approaches. Collectively, these  
603 findings strengthen the utility of MRS applications to examine multi-session/longitudinal  
604 MRS data, in relation to basic and clinical research questions including effects of  
605 interventions. Future investigation is warranted to determine whether the automated  
606 approaches adapted for single-session MRS reduce MRS tissue fraction variability.  
607 Alternatively, voxel placement grounded on biological or physiological data rather than  
608 standardized anatomical guidance, may provide a more useful study measure, even if it  
609 increases between-subject spatial variability in voxel location.

610  
611 Finally, reproducibility in neuroimaging is critical for both research and clinical applications.  
612 MRS is particularly susceptible to scrutiny on this front using standard voxel prescription  
613 methods that are dependent on user expertise. Automated pipelines, such as those  
614 described here, promise to broaden the applicability and generalizability of MRS. This is  
615 especially applicable for large-scale multi-center trials and investigations that are  
616 becoming increasingly common. In the current study, independent research staff without  
617 expertise in neuroanatomy acquired both independent datasets. The consistency of  
618 results among multiple users is strong evidence of the methods ease of use and  
619 demonstrates the applicability to standardize voxel placement across laboratories and  
620 institutions.

621

622 *Caveats*

623

624 The current study evaluated the utility of using pre-determined functional ROIs generated  
625 from previous independent imaging sessions to guide the automated placement of MRS  
626 voxels. This requires an established analysis protocol that can be completed in a relatively  
627 short timeframe prior to follow-up imaging session. This may not be practical for all  
628 investigative teams. Real-time resting state analyses methods would enable the  
629 acquisition and analysis of functional imaging paradigms during the same session, and  
630 while frequency drift has been noted as a major concern for running gradient intensive  
631 sequences prior to collecting MRS, recent largescale data suggest that few scanners  
632 exhibit moderate to severe drift following fMRI using echo planar imaging (39).  
633 Alternatively, the automated approaches proposed in this manuscript could be easily  
634 adapted to perform multi-acquisition and longitudinal placement using coordinates from  
635 structural ROIs or following manual placement, although not formally tested in this  
636 manuscript. That is, manual prescription could be implemented initially, and the center-  
637 of-gravity coordinate of the MRS voxel could be documented and input into the co-  
638 registration steps for subsequent scans to achieve consistency of placement across  
639 repeated acquisitions.

640

641 As described above, a source of potential variability not fully accounted for with the  
642 proposed automated approaches are differences in voxel rotations across acquisitions.  
643 That is, centering the voxel prescription based on a center-of-gravity coordinates does  
644 not provide spatial information to ensure perfect overlap of the subsequent voxel  
645 prescription. Fortunately, discrepancies can be mitigated by establishing standard  
646 protocols for prescribing the rotation of the voxel. For example, cortical regions may be  
647 aligned to the slope of the skull in a designated anatomical plane. Future studies may  
648 develop increasingly automated procedures that algorithmically compute voxel rotation  
649 parameters based on anatomical properties (e.g., skull geometry).

650

651 *Summary and Conclusions*

652

653 Our results provide evidence for the reliability and reproducibility of two pipelines that  
654 enable real-time automated MRS voxel prescription over multi-acquisition and  
655 longitudinal experimental approaches. The complimentary analyses and associated  
656 results highlight the utility of our approaches compared to manual procedures, that is: **(1)**  
657 greater consistency of tissue fraction within MRS voxels; **(2)** the reduction of distance  
658 between center-of-gravity measurements; and **(3)** substantial overlap as measured by the  
659 DSC across multiple users and projects. Together these results suggest that our  
660 approach provides a meaningful step toward the standardization of MRS data acquisition  
661 that is relevant for a variety of MRS research designs that consist of multiple users and  
662 laboratories. Our approach reduces the reliance on technician expertise during MRS data  
663 acquisition by standardizing voxel prescription and thus broadens the usability and  
664 feasibility of MRS as an investigative tool in neuroscience.

665

## 666 **ACKNOWLEDGEMENTS**

667

668 We would like to thank Meng Gu, Ph.D., Ralph Hurd, Ph.D., and Adam Kerr, Ph.D. for  
669 their assistance and expertise with MRI data collection as well as Keith Sudheimer, Ph.D.  
670 for providing functional MRI analysis support in the ancillary studies. Declarations of  
671 interest: none. This work was supported by the NIH National Center for Complementary  
672 and Integrative Health grants 5R33AT009305-03 (NW & DS), 1F32AT010420-01 (JB),  
673 The Stanford University Molecular Imaging Scholars Fellowship (T32CA118681; JB), the  
674 Center for Neurobiological Imaging Innovation Award (JB), and the Phyllis and Jerome  
675 Lyle Rappaport Foundation (MDS). Additional data were provided by the Brain  
676 Stimulation Laboratory directed by (NW) and supported by Charles R. Schwab, the  
677 Gordie Brookstone Fund, the Marshall & Dee Ann Payne Fund, the Avy L. and Robert L.  
678 Miller Foundation, a Stanford Psychiatry Chairman's Small Grant, NARSAD Young  
679 Investigator Award, and the Stanford Department of Psychiatry and Behavioral Sciences.

680

681 **REFERENCES**

- 682 1. Stanley JA, Raz N. Functional Magnetic Resonance Spectroscopy: The "New" MRS for Cognitive  
683 Neuroscience and Psychiatry Research. *Front Psychiatry* 2018;9:76.
- 684 2. Schur RR, Draisma LW, Wijnen JP, Boks MP, Koevoets MG, Joels M, Klomp DW, Kahn RS, Vinkers  
685 CH. Brain GABA levels across psychiatric disorders: A systematic literature review and meta-  
686 analysis of (1) H-MRS studies. *Hum Brain Mapp* 2016;37(9):3337-3352.
- 687 3. Cash RFH, Weigand A, Zalesky A, Siddiqi SH, Downar J, Fitzgerald PB, Fox MD. Using Brain Imaging  
688 to Improve Spatial Targeting of Transcranial Magnetic Stimulation for Depression. *Biol Psychiatry*  
689 2020.
- 690 4. Deng ZD, Lisanby SH, Peterchev AV. Electric field depth-focality tradeoff in transcranial magnetic  
691 stimulation: simulation comparison of 50 coil designs. *Brain Stimul* 2013;6(1):1-13.
- 692 5. Cole EJ, Stimpson KH, Bentzley BS, Gulser M, Cherian K, Tischler C, Nejad R, Pankow H, Choi E,  
693 Aaron H, Espil FM, Pannu J, Xiao X, Duvio D, Solvason HB, Hawkins J, Guerra A, Jo B, Raj KS, Phillips  
694 AL, Barmak F, Bishop JH, Coetzee JP, DeBattista C, Keller J, Schatzberg AF, Sudheimer KD, Williams  
695 NR. Stanford Accelerated Intelligent Neuromodulation Therapy for Treatment-Resistant  
696 Depression. *Am J Psychiatry* 2020;177(8):716-726.
- 697 6. Cash RFH, Cocchi L, Lv J, Fitzgerald PB, Zalesky A. Functional Magnetic Resonance Imaging-Guided  
698 Personalization of Transcranial Magnetic Stimulation Treatment for Depression. *JAMA Psychiatry*  
699 2021;78(3):337-339.
- 700 7. Oz G, Deelchand DK, Wijnen JP, Mlynarik V, Xin L, Mekle R, Noeske R, Scheenen TWJ, Tkac I,  
701 Experts' Working Group on Advanced Single Voxel HM. Advanced single voxel (1) H magnetic  
702 resonance spectroscopy techniques in humans: Experts' consensus recommendations. *NMR*  
703 *Biomed* 2020:e4236.
- 704 8. Rajkowska G, Goldman-Rakic PS. Cytoarchitectonic definition of prefrontal areas in the normal  
705 human cortex: II. Variability in locations of areas 9 and 46 and relationship to the Talairach  
706 Coordinate System. *Cereb Cortex* 1995;5(4):323-337.
- 707 9. von Economo CF, Koskinas GN. Die cytoarchitektonik der hirnrinde des erwachsenen menschen:  
708 J. Springer; 1925.
- 709 10. Sarkissov S, Filimonoff I, Kononowa E, Preobraschenskaja I, Kukuev L. Atlas of the  
710 cytoarchitectonics of the human cerebral cortex. Moscow: Medgiz 1955;20.
- 711 11. Brodmann K. Vergleichende Lokalisationslehre der Grosshirnrinde in ihren Prinzipien dargestellt  
712 auf Grund des Zellenbaues: Barth; 1909.
- 713 12. Koush Y, de Graaf RA, Jiang L, Rothman DL, Hyder F. Functional MRS with J-edited lactate in human  
714 motor cortex at 4T. *Neuroimage* 2019;184:101-108.
- 715 13. Yasen AL, Smith J, Christie AD. Reliability of glutamate and GABA quantification using proton  
716 magnetic resonance spectroscopy. *Neurosci Lett* 2017;643:121-124.
- 717 14. Koush Y, Elliott MA, Mathiak K. Single Voxel Proton Spectroscopy for Neurofeedback at 7 Tesla.  
718 *Materials (Basel)* 2011;4(9).
- 719 15. Park YW, Deelchand DK, Joers JM, Hanna B, Berrington A, Gillen JS, Kantarci K, Soher BJ, Barker  
720 PB, Park H, Oz G, Lenglet C. AutoVOI: real-time automatic prescription of volume-of-interest for  
721 single voxel spectroscopy. *Magn Reson Med* 2018;80(5):1787-1798.
- 722 16. Ou Y, Akbari H, Bilello M, Da X, Davatzikos C. Comparative evaluation of registration algorithms in  
723 different brain databases with varying difficulty: results and insights. *IEEE Trans Med Imaging*  
724 2014;33(10):2039-2065.
- 725 17. Klein A, Andersson J, Ardekani BA, Ashburner J, Avants B, Chiang MC, Christensen GE, Collins DL,  
726 Gee J, Hellier P, Song JH, Jenkinson M, Lepage C, Rueckert D, Thompson P, Vercauteren T, Woods

- 727 RP, Mann JJ, Parsey RV. Evaluation of 14 nonlinear deformation algorithms applied to human  
728 brain MRI registration. *Neuroimage* 2009;46(3):786-802.
- 729 18. Fischl B, Salat DH, Busa E, Albert M, Dieterich M, Haselgrove C, van der Kouwe A, Killiany R,  
730 Kennedy D, Klaveness S, Montillo A, Makris N, Rosen B, Dale AM. Whole brain segmentation:  
731 automated labeling of neuroanatomical structures in the human brain. *Neuron* 2002;33(3):341-  
732 355.
- 733 19. Ashburner J, Friston KJ. Unified segmentation. *Neuroimage* 2005;26(3):839-851.
- 734 20. Tran TK, Vigneron DB, Sailasuta N, Tropp J, Le Roux P, Kurhanewicz J, Nelson S, Hurd R. Very  
735 selective suppression pulses for clinical MRSI studies of brain and prostate cancer. *Magn Reson*  
736 *Med* 2000;43(1):23-33.
- 737 21. Webb PG, Sailasuta N, Kohler SJ, Raidy T, Moats RA, Hurd RE. Automated single-voxel proton MRS:  
738 technical development and multisite verification. *Magn Reson Med* 1994;31(4):365-373.
- 739 22. Bodenhausen G, Freeman R, Turner DL. Suppression of artifacts in two-dimensional J  
740 spectroscopy. *Journal of Magnetic Resonance (1969)* 1977;27(3):511-514.
- 741 23. Mescher M, Merkle H, Kirsch J, Garwood M, Gruetter R. Simultaneous in vivo spectral editing and  
742 water suppression. *NMR Biomed* 1998;11(6):266-272.
- 743 24. Faerman A, Bishop JH, Stimpson KH, Phillips A, Gülsler M, Amin H, Nejad R, DeSouza DD, Geoly AD,  
744 Kallioniemi E, Jo B, Williams NR, Spiegel D. Modulation of a Stable Neurobehavioral Trait Using  
745 Repetitive Transcranial Magnetic Stimulation: A Preregistered Randomized Controlled Trial.  
746 medRxiv 2021:2021.2007.2008.21260222.
- 747 25. Collignon A, Maes F, Delaere D, Vandermeulen D, Suetens P, Marchal G. Automated multi-  
748 modality image registration based on information theory. 1995.
- 749 26. Colin S, David John H, Derek LGH. Normalized entropy measure for multimodality image alignment.  
750 1998.
- 751 27. Press WH, Teukolsky SA, Vetterling WT, Flannery BP. *Numerical recipes in C (2nd ed.): the art of*  
752 *scientific computing*: Cambridge University Press; 1992.
- 753 28. Cox RW. AFNI: software for analysis and visualization of functional magnetic resonance  
754 neuroimages. *Comput Biomed Res* 1996;29(3):162-173.
- 755 29. Edden RA, Puts NA, Harris AD, Barker PB, Evans CJ. Gannet: A batch-processing tool for the  
756 quantitative analysis of gamma-aminobutyric acid-edited MR spectroscopy spectra. *J Magn Reson*  
757 *Imaging* 2014;40(6):1445-1452.
- 758 30. Porges EC, Woods AJ, Lamb DG, Williamson JB, Cohen RA, Edden RAE, Harris AD. Impact of tissue  
759 correction strategy on GABA-edited MRS findings. *Neuroimage* 2017;162:249-256.
- 760 31. Harris AD, Puts NA, Edden RA. Tissue correction for GABA-edited MRS: Considerations of voxel  
761 composition, tissue segmentation, and tissue relaxations. *J Magn Reson Imaging* 2015;42(5):1431-  
762 1440.
- 763 32. Sørensen T. A Method of establishing Groups of Equal Amplitude in Plant Sociology based on  
764 Similarity of Species Content, and its application to analyses of the vegetation on Danish commons.  
765 Pp. 34. København 1948.
- 766 33. Dice LR. Measures of the Amount of Ecologic Association Between Species. *Ecology*  
767 1945;26(3):297-302.
- 768 34. Shapiro SS, Wilk MB. An analysis of variance test for normality (complete samples)†. *Biometrika*  
769 1965;52(3-4):591-611.
- 770 35. Conover WJ, Iman RL. Rank Transformations as a Bridge between Parametric and Nonparametric  
771 Statistics. *The American Statistician* 1981;35(3):124-129.
- 772 36. Bai X, Harris AD, Gong T, Puts NAJ, Wang G, Schar M, Barker PB, Edden RAE. Voxel Placement  
773 Precision for GABA-Edited Magnetic Resonance Spectroscopy. *Open J Radiol* 2017;7(1):35-44.

- 774 37. Gasparovic C, Song T, Devier D, Bockholt HJ, Caprihan A, Mullins PG, Posse S, Jung RE, Morrison  
775 LA. Use of tissue water as a concentration reference for proton spectroscopic imaging. *Magnetic*  
776 *Resonance in Medicine* 2006;55(6):1219-1226.
- 777 38. Hurd R, Sailasuta N, Srinivasan R, Vigneron DB, Pelletier D, Nelson SJ. Measurement of brain  
778 glutamate using TE-averaged PRESS at 3T. *Magn Reson Med* 2004;51(3):435-440.
- 779 39. Hui SCN, Mikkelsen M, Zollner HJ, Ahluwalia V, Alcauter S, Baltusis L, Barany DA, Barlow LR, Becker  
780 R, Berman JI, Berrington A, Bhattacharyya PK, Blicher JU, Bogner W, Brown MS, Calhoun VD,  
781 Castillo R, Cecil KM, Choi YB, Chu WCW, Clarke WT, Craven AR, Cuypers K, Dacko M, de la Fuente-  
782 Sandoval C, Desmond P, Domagalik A, Dumont J, Duncan NW, Dydak U, Dyke K, Edmondson DA,  
783 Ende G, Ersland L, Evans CJ, Fermin ASR, Ferretti A, Fillmer A, Gong T, Greenhouse I, Grist JT, Gu  
784 M, Harris AD, Hat K, Heba S, Heckova E, Hegarty JP, 2nd, Heise KF, Jacobson A, Jansen JFA, Jenkins  
785 CW, Johnston SJ, Juchem C, Kangarlu A, Kerr AB, Landheer K, Lange T, Lee P, Levendovszky SR,  
786 Limperopoulos C, Liu F, Lloyd W, Lythgoe DJ, Machizawa MG, MacMillan EL, Maddock RJ,  
787 Manzhurtsev AV, Martinez-Gudino ML, Miller JJ, Mirzakhani H, Moreno-Ortega M, Mullins PG,  
788 Near J, Noeske R, Nordhoy W, Oeltzschner G, Osorio-Duran R, Otaduy MCG, Pasaye EH, Peeters  
789 R, Peltier SJ, Pilatus U, Polomac N, Porges EC, Pradhan S, Prisciandaro JJ, Puts NA, Rae CD, Reyes-  
790 Madrigal F, Roberts TPL, Robertson CE, Rosenberg JT, Rotaru DG, O'Gorman Tuura RL, Saleh MG,  
791 Sandberg K, Sangill R, Schembri K, Schrantee A, Semenova NA, Singel D, Sitnikov R, Smith J, Song  
792 Y, Stark C, Stoffers D, Swinnen SP, Tain R, Tanase C, Tapper S, Tegenthoff M, Thiel T, Thioux M,  
793 Truong P, van Dijk P, Vella N, Vidyasagar R, Vovk A, Wang G, Westlye LT, Wilbur TK, Willoughby  
794 WR, Wilson M, Wittsack HJ, Woods AJ, Wu YC, Xu J, Lopez MY, Yeung DKW, Zhao Q, Zhou X, Zupan  
795 G, Edden RAE, Nakajima SL, Honda S. Frequency drift in MR spectroscopy at 3T. *Neuroimage*  
796 2021;241:118430.  
797
